# Supplementary material for: Linkage Analysis and QTL Mapping Using SNP Dosage Data in a Tetraploid Potato Mapping Population
Source: PLoS One. 2013 May 21;8(5):e63939. doi: 10.1371/journal.pone.0063939 (PMC3660524; doi:10.1371/journal.pone.0063939)
Supplement: Table S11 — Order of the mapped, binned and duplicate SNPs on chromsomes I–XII. The (near) duplicate and binned markers are listed below the closest mapped marker. The recombination fraction of each binned marker with the closest mapped marker is shown in the final column. (XLS) [file pone.0063939.s012.xls]

## Sheet: Sheet1
No	Position (cM)	Mapped	Binned	Recombination frequency with closest mapped marker. D=(near)duplicate
1	0	c2_37209
2	17.52	c1_4296
3	17.7	c2_37231
4	18.59	c2_37185
5			c2_37206	D
6			c2_37222	D
7	20.89	c1_4336
8	20.93	c1_4319
9			c2_13419	D
10			c1_4322	D
11			c1_2228	0.044
12			c2_13566	0.0323
13	21.32	c2_33657
14			c2_5960	0.0286
15			c1_10069	0.0234
16	24.83	c1_2162
17			c2_6003	D
18			c1_11092	0.0158
19			c2_6173	0.0158
20			c1_4347	D
21			c2_49280	D
22	25.24	c2_23958
23	25.36	c2_13431
24	26.5	c2_6002
25	26.92	c2_23987
26	28.54	c1_2280
27			c2_57429	0.0322
28			c2_6100	0.0068
29			c2_6185	0.0427
30			c1_2212	0.0373
31			c1_2304	0.0483
32	29.24	c2_21066
33			c1_6646	0.0128
34	29.71	c1_16456
35			c2_6256	D
36			c2_20948	D
37			c1_2203	0.0295
38	30.91	c1_7666
39			c2_44868	D
40	31.59	c1_16496
41	33.36	c2_23923
42			c1_7658	0.0001
43			c2_20952	0.0001
44			c2_32371	D
45			c2_23915	D
46			c2_21071	D
47			c2_20970	D
48	33.76	c2_20946
49	34.68	c2_23986
50	34.98	c2_23942
51	35.59	c2_12266
52			c1_4000	0.0199
53			c2_49311	0.0199
54			c2_49312	0.0446
55			c2_12334	0.044
56			c2_53682	D
57	35.65	c2_23943
58	36.07	c2_20942
59			c2_20947	D
60			c2_23975	0.0316
61	36.58	c2_23944
62			c1_16301	0.0001
63			c2_21058	D
64	36.9	c2_12333
65			c2_57239	D
66	37.38	c2_12252
67	38.19	c2_6004
68			c2_6000	D
69	39.5	c2_32989
70			c2_12276	0.0158
71			c2_56627	0.0369
72			c2_56629	D
73	39.67	c2_35845
74	40.94	c2_49313
75			c2_32994	0.0002
76			c2_24318	0.0249
77			c2_53273	D
78	41.47	c1_3996
79	42.05	c1_15658
80			c2_49294	D
81			c2_33002	D
82			c2_32976	D
83			c2_32977	D
84			c2_32979	D
85			c2_32981	D
86			c2_32983	D
87			c1_3992	0.0421
88	45.28	c2_57316
89			c1_11237	0.0002
90			c2_57705	0.0002
91			c2_37586	D
92			c2_11366	D
93			c1_3694	D
94			c2_11364	D
95	45.53	c2_32333
96			c2_45474	D
97			c2_56624	D
98			c2_32337	D
99			c2_56631	D
100			c2_56632	D
101			c2_32954	D
102			c2_56633	D
103			c2_32334	D
104			c2_56623	D
105	45.83	c2_56630
106			c2_57322	0.0005
107	46.68	c1_10144
108			c2_29096	D
109			c2_29148	D
110	46.8	c2_32341
111			c2_29129	0.0422
112	48.97	c2_57319
113	49.63	c2_11362
114			c2_37580	D
115	50.5	c1_5964
116			c2_2957	0.0123
117	52.58	c2_4225
118			c2_4316	0.0001
119	53.43	c2_29434
120			c2_12368	0.0005
121			c2_29435	0.0002
122			c2_30361	D
123	53.6	c2_4268
124			c2_44269	0.0245
125			c2_50332	0.01
126			c2_37588	0.0397
127			c2_29141	0.0295
128	53.88	c2_30371
129			c2_41090	D
130			c1_1775	0.0324
131			c2_31433	0.0162
132			c1_5411	0.045
133			c2_30363	0.016
134			c2_44634	0.0367
135			c1_5716	D
136			c2_31433	D
137			c2_31443	D
138			c2_4978	D
139			c2_4986	D
140	56.23	c2_55963
141			c2_51546	0.045
142	58.2	c2_13613
143	58.49	c2_13627
144			c2_55949	0.0358
145			c1_16406	0.0431
146	58.94	c1_4371
147	59.08	c2_13632
148			c2_13633	D
149			c2_13636	D
150			c2_13634	D
151			c2_56243	D
152			c2_45202	D
153	59.64	c1_4359
154			c1_15081	0.0263
155			c2_14951	0.0421
156			c2_3841	0.0474
157			c2_14952	D
158			c2_14953	D
159			c2_3873	D
160			c2_14946	D
161	59.98	c1_4378
162	61.04	c2_14940
163			c2_54586	0.0003
164	61.4	c2_36581
165			c2_31444	0.0214
166			c2_31472	D
167	64.12	c2_49812
168			c1_14683	0.0267
169			c2_51548	0.0011
170			c2_54588	0.0057
171	65.49	c2_13590
172			c2_46858	0.0253
173			c1_9499	0.034
174	67.95	c1_1318
175			c1_1304	0.0168
176	69.24	c2_3682
177	72.45	c2_3685
178	72.87	c1_4942
179	73.58	c2_56752
180			c2_3823	0.0325
181	74.36	c2_3747
182			c2_3805	0.0001
183			c2_22165	0.0129
184			c2_22186	0.0376
185	75.49	c2_3680
186			c1_1264	0.0001
187			c2_3684	0.0001
188			c2_22184	D
189			c2_3737	D
190			c2_3691	D
191	77.2	c2_22219
192	78.8	c2_3738
193			c2_3753	0.0001
194	79.55	c2_15330
195	80.01	c2_22205
196	80.8	c1_4926
197			c2_15332	D
198			c2_15342	D
199			c2_15334	0.0164
200			c2_15338	0.0122
201			c2_15333	0.0284
202			c1_9183	0.05
203			c2_30298	D
204	80.95	c2_15336
205	81.5	c2_15388
206	83.58	c1_4947
207	83.62	c1_9204
208	84.05	c2_37342
209			c2_43887	0.0211
210			c1_12896	0.0004
211			c2_43849	D
212			c2_43863	D
213			c2_43852	D
214	85.88	c2_43886
215	86.42	c1_10269
216			c1_10270	D
217	87.97	c2_34197
218	88.49	c2_30299
219	89.14	c2_34191
220			c1_14770	0.0001
221	90.04	c2_34196
222			c2_43880	0.0311
223	91.1	c1_10255
224			c2_34219	D
225			c2_34189	D
226			c2_34188	D
227	92.12	c2_51273
228	93.65	c2_31487
229	93.81	c2_34203
230	95.12	c1_10253
231			c2_34204	0.0209
232	96.19	c2_34202
233			c1_10252	0.0001
234			c2_31579	D
